# Supplementary material
Source: Springer Nature journal article supplement (https://www.springermedizin.de/resource/supplementary/13063_2011_683_MOESM1_ESM.pdf/9618482)

Enrollment

Allocation

Follow-up

Analysis

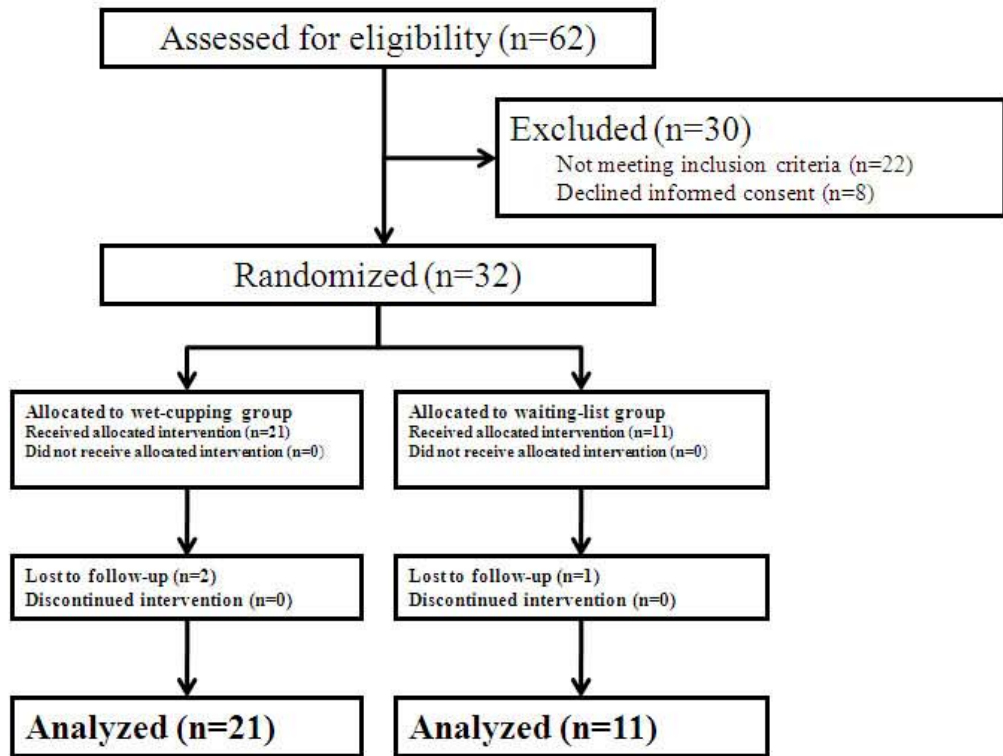

Supplement: MOESM1 [file 9618482]
